- breast tissue: Implications for breast cancer diagnosis *in vivo*. *J Raman Spectrosc* 2002; 33:552–63
57. Perlas A, Chaparro LE, Chin KJ: Lumbar neuraxial ultrasound for spinal and epidural anesthesia: A systematic review and meta-analysis. *Reg Anesth Pain Med* 2016; 41:251–60
  58. Sawada A, Kii N, Yoshikawa Y, Yamakage M: Epidrum(@): A new device to identify the epidural space with an epidural Tuohy needle. *J Anesth* 2012; 26:292–5
  59. Ghelber O, Gebhard RE, Vora S, Hagberg CA, Szmuk P: Identification of the epidural space using pressure measurement with the compuflo injection pump—A pilot study. *Reg Anesth Pain Med* 2008; 33:346–52
  60. Lirk P, Kolbitsch C, Putz G, Colvin J, Colvin HP, Lorenz I, Keller C, Kirchmair L, Rieder J, Moriggl B: Cervical and high thoracic ligamentum flavum frequently fails to fuse in the midline. *ANESTHESIOLOGY* 2003; 99:1387–90
  61. Lim L, Nichols B, Rajaram N, Tunnell JW: Probe pressure effects on human skin diffuse reflectance and fluorescence spectroscopy measurements. *J Biomed Opt* 2011; 16:011012
  62. Barman I, Dingari NC, Saha A, McGee S, Galindo LH, Liu W, Plecha D, Klein N, Dasari RR, Fitzmaurice M: Application of Raman spectroscopy to identify microcalcifications and underlying breast lesions at stereotactic core needle biopsy. *Cancer Res* 2013; 73:3206–15

## ANESTHESIOLOGY REFLECTIONS FROM THE WOOD LIBRARY-MUSEUM

### From a Jailer and from a Queen: Shakespearean Deadening and Colton Gas

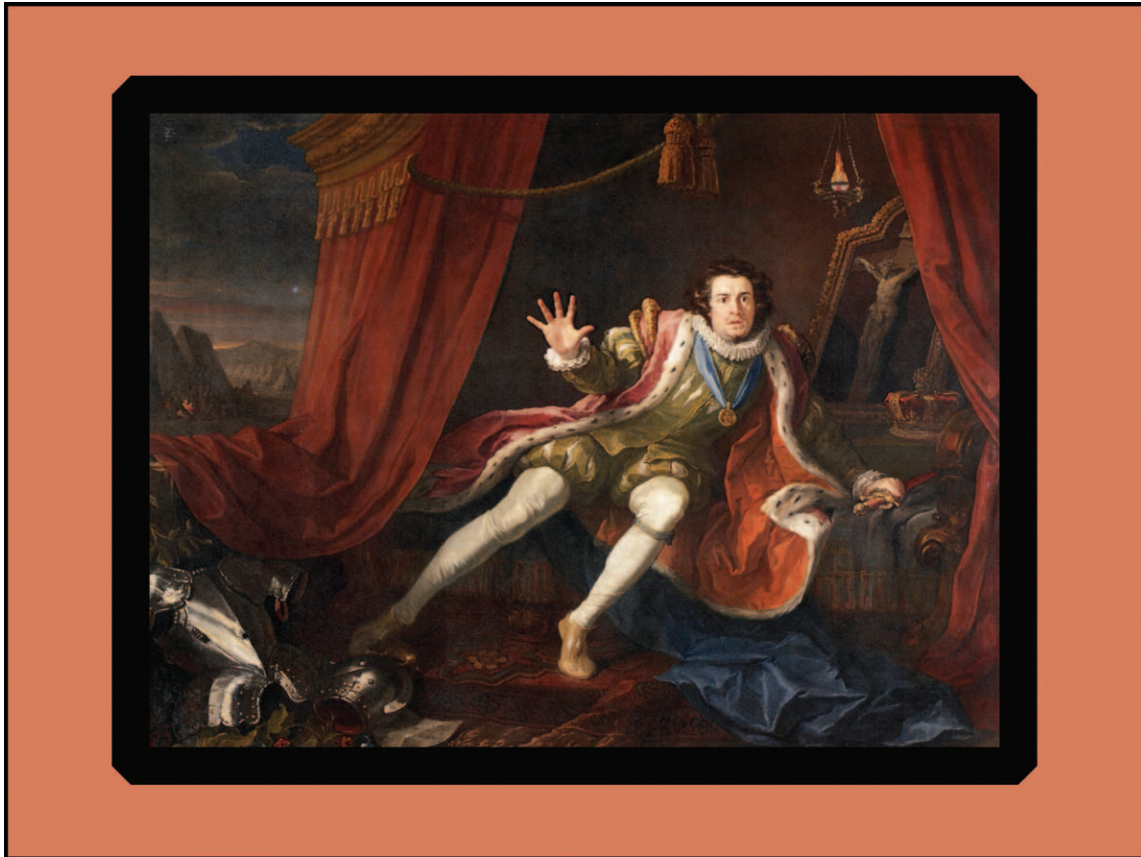

Shakespearean scholar G. Q. Colton (1814 to 1898) revived Americans' anesthetic use of laughing gas. Preferring to deaden dental pain rather than the dental patient, Colton apparently agreed with Shakespeare's First Gaoler (or Jailer, from the Bard's comedy *Cymbeline*) who opined that "he that sleeps feels not the tooth-ache...." Although administration of 100% nitrous oxide was reported as safe by Colton, dentists delivering hypoxic "Colton gas" could render patients "untimely smothered," to quote Dowager Queen Margaret from Shakespeare's historical play *Richard III*. She despised King Richard III, who was played onstage by actor David Garrick. In 1745, painter William Hogarth immortalized Garrick (*above*) playing Richard III. (Copyright © the American Society of Anesthesiologists' Wood Library-Museum of Anesthesiology.)

George S. Bause, M.D., M.P.H., Honorary Curator, ASA's Wood Library-Museum of Anesthesiology, Schaumburg, Illinois, and Clinical Associate Professor, Case Western Reserve University, Cleveland, Ohio. UJYC@aol.com.
